# Supplementary material
Source: PubMed Central journal article supplement (PMC4334234)
Supplement: 130216suppa1.pdf [file 130216suppa1.pdf]

## Appendix E1

### Calculating the CT GAP Score

Step 1: Calculate the CT GAP score ( $S$ ):

$$S = [0.364 \cdot (M - .707) - 0.0146 \cdot (FVC - 66.763) + 0.131 \cdot (AGE1 - 67.676) - 0.0814 \cdot (AGE2) + 0.0287 \cdot (FIB - 22.147)],$$

where  $M$  is 1 if the patient is male and 0 if the patient is female; AGE1 is the patient's age in years; AGE2 is the value in Table E1 that corresponds with the patient's age. Enter the value of AGE2 that corresponds to the patient's age in years; FIB = CT fibrosis score.

Step 2: Calculate risk by using  $S$ :

$$1\text{-year risk} = 100 \cdot [1 - \exp(-\exp(S) \cdot 0.280)]$$

$$2\text{-year risk} = 100 \cdot [1 - \exp(-\exp(S) \cdot 0.555)]$$

$$3\text{-year risk} = 100 \cdot [1 - \exp(-\exp(S) \cdot 0.918)]$$

**Table E1. AGE2 Values for Calculating CT GAP Score**

| Patient Age | AGE2 Value |
|-------------|------------|
| ≤50         | 0          |
| 51          | 0          |
| 52          | 0          |
| 53          | 0          |
| 54          | 0          |
| 55          | 0          |
| 56          | 0.002      |
| 57          | 0.015      |
| 58          | 0.051      |
| 59          | 0.121      |
| 60          | 0.236      |
| 61          | 0.408      |
| 62          | 0.648      |
| 63          | 0.968      |
| 64          | 1.378      |
| 65          | 1.890      |
| 66          | 2.516      |
| 67          | 3.266      |
| 68          | 4.153      |
| 69          | 5.183      |
| 70          | 6.345      |
| 71          | 7.625      |
| 72          | 9.009      |
| 73          | 10.481     |
| 74          | 12.027     |
| 75          | 13.632     |
| 76          | 15.280     |
| 77          | 16.959     |

| Patient Age | AGE2 Value |
|-------------|------------|
| 78          | 18.652     |
| 79          | 20.348     |
| 80          | 22.043     |
| 81          | 23.739     |
| 82          | 25.435     |
| 83          | 27.130     |
| 84          | 28.826     |
| 85          | 30.522     |
| 86          | 32.217     |
| 87          | 33.913     |
| 88          | 35.609     |
| 89          | 37.304     |

**Table E2. Relationships between the CT Quantitative Scores and Individual GAP Predictors**

| GAP Predictor         | Data   | <i>P</i> Value |
|-----------------------|--------|----------------|
| CT fibrosis score     |        |                |
| Sex                   |        |                |
| Male                  | 22.9   | .041           |
| Female                | 20.2   |                |
| Age                   | 0.18*  | .001           |
| FVC                   | -0.47* | <.001          |
| DLCO                  | -0.37* | <.001          |
| Able to perform DLCO? |        |                |
| Yes                   | 21.1   | <.001          |
| No                    | 36.4   |                |
| Calculated GAP score  | 0.49*  | <.001          |
| CT emphysema score    |        |                |
| Gender                |        |                |
| Male                  | 0.56   | .158           |
| Female                | 0.40   |                |
| Age                   | 0.04*  | .419           |
| FVC                   | 0.17*  | .001           |
| DLCO                  | -0.29* | <.001          |
| Able to perform DLCO? |        |                |
| Yes                   | 0.52   | .632           |
| No                    | 0.42   |                |
| Calculated GAP score  | 0.10*  | .055           |

Note.—Unless otherwise indicated, data are sample means (for categorical variables).

\* Data are Spearman correlation coefficient (*r*) reported for continuous variables.

**Table E3. CT Fibrosis and Emphysema Scores and Risk of Death after Adjustment for Physiologic Variables**

| Variable                            | Cohort 1 (n = 176)           |         | Cohort 2 (n = 172)           |         | Combined Cohort (n = 348)    |         |
|-------------------------------------|------------------------------|---------|------------------------------|---------|------------------------------|---------|
|                                     | Subdistribution Hazard Ratio | P Value | Subdistribution Hazard Ratio | P Value | Subdistribution Hazard Ratio | P Value |
| <b>Fibrosis score + FVC</b>         |                              |         |                              |         |                              |         |
| FVC                                 | 0.99 (0.98, 1.00)            | .137    | 0.99 (0.97, 1.00)            | .133    | 0.99 (0.98, 1.00)            | .028    |
| Fibrosis score                      | 1.03 (1.01, 1.06)            | .005    | 1.02 (1.00, 1.04)            | .065    | 1.03 (1.01, 1.05)            | <.001   |
| <b>Fibrosis score + DLCO</b>        |                              |         |                              |         |                              |         |
| DLCO                                | 0.98 (0.97, 1.00)            | .035    | 0.96 (0.94, 0.99)            | .002    | 0.98 (0.96, 0.99)            | .001    |
| Fibrosis score                      | 1.02 (1.00, 1.05)            | .077    | 1.00 (0.98, 1.03)            | .820    | 1.02 (1.00, 1.03)            | .059    |
| <b>Fibrosis score + FVC + DLCO</b>  |                              |         |                              |         |                              |         |
| FVC                                 | 0.99 (0.98, 1.01)            | .342    | 1.00 (0.98, 1.01)            | .766    | 0.99 (0.99, 1.00)            | .298    |
| DLCO                                | 0.98 (0.97, 1.00)            | .063    | 0.96 (0.94, 0.99)            | .003    | 0.98 (0.96, 0.99)            | .002    |
| Fibrosis score                      | 1.02 (1.00, 1.05)            | .099    | 1.00 (0.98, 1.03)            | .899    | 1.01 (1.00, 1.03)            | .104    |
| <b>Emphysema score + FVC</b>        |                              |         |                              |         |                              |         |
| FVC                                 | 0.98 (0.97, 0.99)            | .008    | 0.98 (0.97, 0.99)            | .003    | 0.98 (0.97, 0.99)            | <.001   |
| Emphysema score                     | 1.36 (1.09, 1.69)            | .006    | 1.10 (0.90, 1.34)            | .385    | 1.22 (1.05, 1.41)            | .008    |
| <b>Emphysema score + DLCO</b>       |                              |         |                              |         |                              |         |
| DLCO                                | 0.98 (0.96, 0.99)            | .003    | 0.96 (0.94, 0.98)            | <.001   | 0.97 (0.96, 0.98)            | <.001   |
| Emphysema score                     | 1.13 (0.92, 1.38)            | .229    | 0.96 (0.75, 1.23)            | .742    | 1.05 (0.90, 1.22)            | .549    |
| <b>Emphysema score + FVC + DLCO</b> |                              |         |                              |         |                              |         |
| FVC                                 | 0.99 (0.97, 1.00)            | .085    | 1.00 (0.98, 1.01)            | .788    | 0.99 (0.98, 1.00)            | .068    |
| DLCO                                | 0.98 (0.97, 1.00)            | .058    | 0.96 (0.94, 0.98)            | .001    | 0.98 (0.96, 0.99)            | .001    |
| Emphysema score                     | 1.25 (0.99, 1.60)            | .064    | 0.97 (0.75, 1.25)            | .817    | 1.11 (0.94, 1.33)            | .211    |

Note.—Data are subdistribution hazard ratios, with 95% CIs based on competing risks regression analysis.

**Table E4. Prognostic Value of CT Fibrosis Score and CT Emphysema Score When Added to the GAP Model**

| Variables                          | Cohort 1<br>(n = 176) | Cohort 2<br>(n = 172) | Combined<br>Cohort<br>(n = 348) |
|------------------------------------|-----------------------|-----------------------|---------------------------------|
| <b>GAP score</b>                   |                       |                       |                                 |
| C index                            | 71.5 (65.7, 76.9)     | 69.5 (64.2, 76.3)     | 70.7 (66.4, 74.5)               |
| <b>GAP score + fibrosis score</b>  |                       |                       |                                 |
| C index                            | 71.4 (65.1, 76.2)     | 68.6 (61.3, 73.6)     | 70.7 (66.9, 74.4)               |
| Change in C index                  | 0.0 (-2.8, 1.8)       | -1.0 (-2.2, -0.5)     | 0.0 (-1.8, 0.5)                 |
| NRI                                | 0.0* (-9.3, 9.3)      | 0.0*                  | 1.3 (-3.8, 6.4)                 |
| Clinical NRI                       | 0.0* (-13.0, 13.0)    | 0.0*                  | 1.2 (-6.1, 8.6)                 |
| <b>GAP score + emphysema score</b> |                       |                       |                                 |
| C index                            | 71.6 (64.7, 76.5)     | 68.7 (61.7, 73.4)     | 70.7 (66.7, 74.5)               |
| Change in C index                  | 0.2 (-1.1, 2.4)       | -0.8 (-1.8, -0.6)     | 0.0 (-1.3, 0.4)                 |
| NRI                                | 5.8 (-3.4, 14.9)      | -1.1 (-5.5, 3.4)      | 1.8 (-1.1, 4.7)                 |
| Clinical NRI                       | 4.7 (-9.4, 18.8)      | -0.8 (-7.9, 6.3)      | 1.6 (-3.1, 6.4)                 |

Note.—Data are percentages, with 95% bootstrap CIs in parentheses.

\* Symmetric reclassification occurred in cohort 1, and no reclassification occurred in cohort 2.

**Table E5. Death Risk Analysis of the GAP Score with CT Fibrosis and Emphysema Scores**

| Variables                  | Radiologist 1                |         | Radiologist 2                |         | Averaged                     |         |
|----------------------------|------------------------------|---------|------------------------------|---------|------------------------------|---------|
|                            | Subdistribution Hazard Ratio | P Value | Subdistribution Hazard Ratio | P Value | Subdistribution Hazard Ratio | P Value |
| <b>Unadjusted Analysis</b> |                              |         |                              |         |                              |         |
| GAP score                  | 3.28 (2.54, 4.23)            | <.001   | 3.28 (2.54, 4.23)            | <.001   | 3.28 (2.54, 4.23)            | <.001   |
| Fibrosis score             | 1.03 (1.01, 1.04)            | <.001   | 1.04 (1.02, 1.05)            | <.001   | 1.03 (1.02, 1.05)            | <.001   |
| Emphysema score            | 1.12 (0.98, 1.28)            | .085    | 1.16 (1.00, 1.34)            | .056    | 1.15 (1.00, 1.32)            | .052    |
| <b>Adjusted Analysis</b>   |                              |         |                              |         |                              |         |
| <b>Model 1</b>             |                              |         |                              |         |                              |         |
| GAP score                  | 3.05 (2.30, 4.03)            | <.001   | 2.97 (2.21, 3.98)            | <.001   | 2.98 (2.23, 3.98)            | <.001   |
| Fibrosis score             | 1.01 (0.99, 1.02)            | .185    | 1.01 (1.00, 1.03)            | .143    | 1.01 (1.00, 1.03)            | .149    |
| <b>Model 2</b>             |                              |         |                              |         |                              |         |
| GAP score                  | 3.27 (2.53, 4.22)            | <.001   | 3.27 (2.52, 4.23)            | <.001   | 3.26 (2.52, 4.22)            | <.001   |
| Emphysema score            | 1.07 (0.93, 1.24)            | .335    | 1.11 (0.94, 1.31)            | .228    | 1.09 (0.93, 1.28)            | .264    |

Note.—Unless otherwise indicated, data are subdistribution hazard ratios with 95% CIs in parentheses. Analysis restricted to subjects in the combined cohort with dual radiological readings. n = 334 of 348.

**Table E6. Performance of the GAP Score with CT Fibrosis and Emphysema Scores**

| Variables                   | Radiologist 1     | Radiologist 2     | Averaged          |
|-----------------------------|-------------------|-------------------|-------------------|
| GAP score                   |                   |                   |                   |
| C index                     | 71.5 (68.0, 75.0) | 71.5 (68.0, 75.0) | 71.5 (68.0, 75.0) |
| GAP score + fibrosis score  |                   |                   |                   |
| C index                     | 71.4 (67.7, 74.8) | 71.4 (67.5, 75.0) | 71.4 (67.3, 74.9) |
| Change in C index           | -0.1 (-1.6, 0.5)  | -0.1 (-1.5, 0.5)  | -0.1 (-1.3, 0.5)  |
| NRI                         | 1.3 (-3.4, 6.1)   | 0.3 (-5.2, 5.8)   | 0.4 (-5.1, 6.0)   |
| Clinical NRI                | 1.3 (-5.9, 8.6)   | 0.7 (-7.4, 8.7)   | 0.9 (-7.6, 9.4)   |
| GAP score + emphysema score |                   |                   |                   |
| C index                     | 71.5 (67.6, 75.2) | 71.7 (67.6, 75.1) | 71.5 (67.7, 74.6) |
| Change in C index           | 0.0 (-1.1, 0.4)   | 0.1 (-2.2, 0.4)   | 0.0 (-1.2, 0.6)   |
| NRI                         | -2.0 (-5.4, 1.5)  | -1.9 (-4.9, 1.2)  | -2.0 (-5.4, 1.5)  |
| Clinical NRI                | -2.0 (-6.3, 2.3)  | -1.8 (-5.8, 2.2)  | -2.0 (-6.3, 2.3)  |

Note.—Data are percentages, with 95% bootstrap CIs in parentheses. Analysis restricted to subjects in the combined cohort with dual radiology reads,  $n = 334$  of 348.
